# Supplementary material for: Presence of Arsenic in Potential Sources of Drinking Water Supply Located in a Mineralized and Mined Area of the Sierra Madre Oriental in Mexico
Source: MDPI journal article supplement (doi:10.3390/toxics9110307), 2021-11-15
Supplement: s1 [file s1]

# Supplementary Materials: Presence of Arsenic in Potential Sources of Drinking Water Supply Located in a Mineralized and Mined Area of the Sierra Madre Oriental in Mexico

Victor Manuel Escot-Espinoza, Yann Rene Ramos-Arroyo, Isabel Lázaro, Isidro Montes-Avila, Leticia Carrizalez-Yañez and Roberto Briones-Gallardo

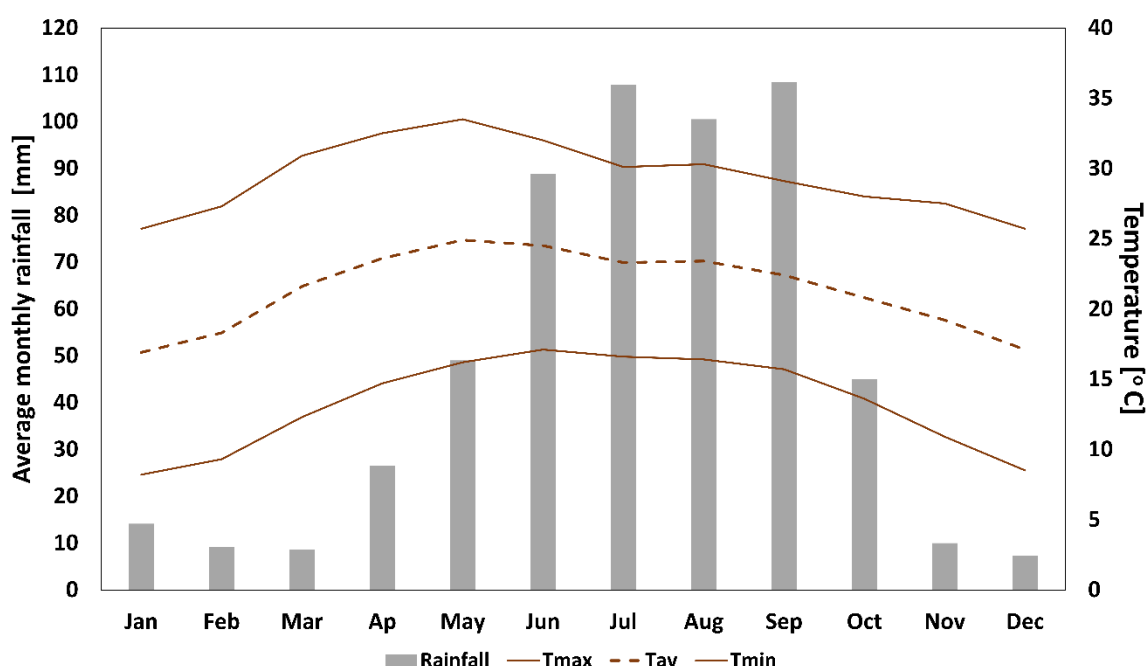

Figure S1. Climatograph of the study area based on the average of monthly data of the period 1951 to 2015 [30].

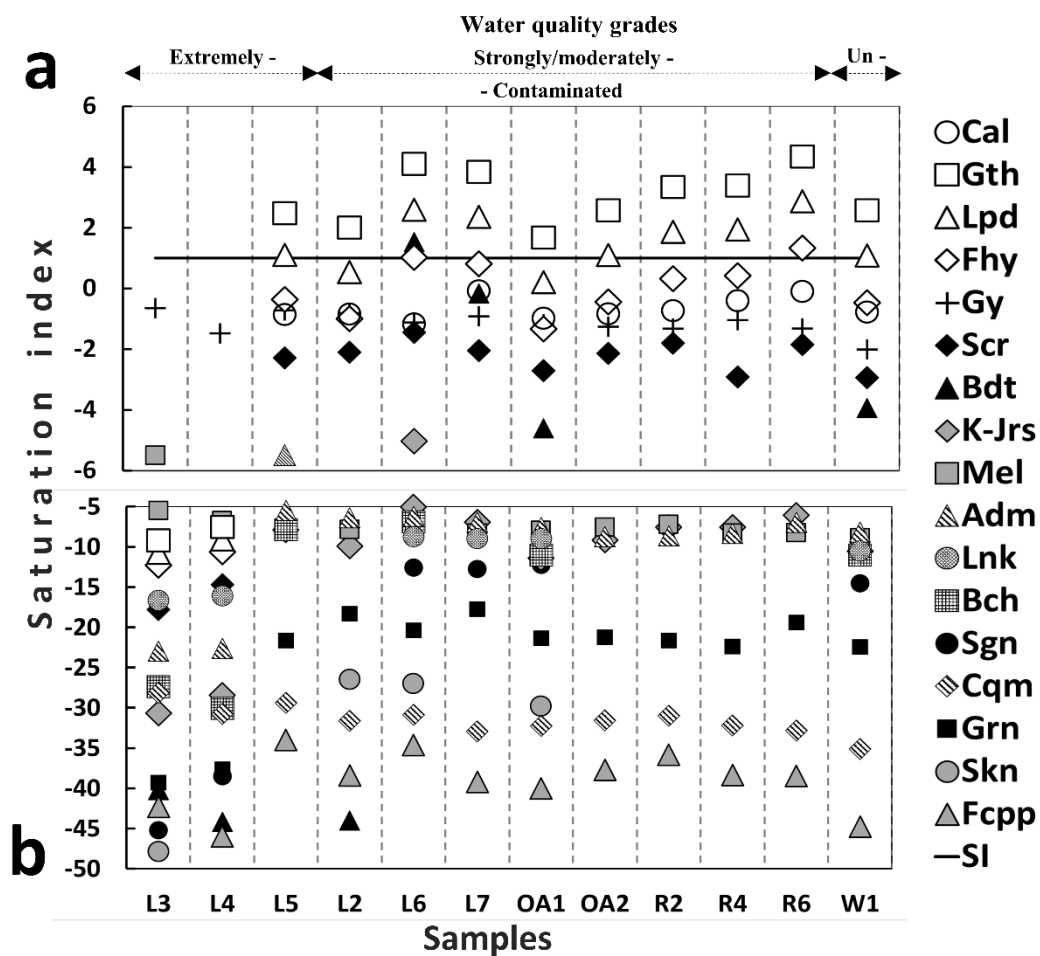

**Figure S2.** Saturation index estimation of the main mineral phases identified by XRD in samples from AMDW4 when they are in contact with the physicochemical quality of leachate, river, well and spring samples using PHREEQCI (2.15 software).

**Table S1.** Pearson's correlation coefficient between the physicochemical parameters and ions quantified in the leachates, river, and spring water samples in the study area.

|                               | pH    | E <sub>H</sub> | DO    | EC    | Ca    | Mg    | Na    | K     | Cl <sup>-</sup> | HCO <sub>3</sub> <sup>-</sup> | CO <sub>3</sub> <sup>2-</sup> | SO <sub>4</sub> <sup>2-</sup> | NO <sub>3</sub> <sup>-</sup> | Si    | As    | Al    | Cu   | Fe    | Pb    | Sr    | Zn   | Hg    | Tl   | Sb   | Se |
|-------------------------------|-------|----------------|-------|-------|-------|-------|-------|-------|-----------------|-------------------------------|-------------------------------|-------------------------------|------------------------------|-------|-------|-------|------|-------|-------|-------|------|-------|------|------|----|
| pH                            | 1     |                |       |       |       |       |       |       |                 |                               |                               |                               |                              |       |       |       |      |       |       |       |      |       |      |      |    |
| E <sub>H</sub>                | -0.32 | 1              |       |       |       |       |       |       |                 |                               |                               |                               |                              |       |       |       |      |       |       |       |      |       |      |      |    |
| DO                            | 0.00  | 0.11           | 1     |       |       |       |       |       |                 |                               |                               |                               |                              |       |       |       |      |       |       |       |      |       |      |      |    |
| EC                            | -0.90 | 0.31           | -0.17 | 1     |       |       |       |       |                 |                               |                               |                               |                              |       |       |       |      |       |       |       |      |       |      |      |    |
| Ca                            | -0.49 | 0.18           | -0.36 | 0.71  | 1     |       |       |       |                 |                               |                               |                               |                              |       |       |       |      |       |       |       |      |       |      |      |    |
| Mg                            | 0.00  | 0.05           | -0.21 | 0.26  | 0.54  | 1     |       |       |                 |                               |                               |                               |                              |       |       |       |      |       |       |       |      |       |      |      |    |
| Na                            | -0.45 | 0.10           | -0.21 | 0.56  | 0.66  | 0.06  | 1     |       |                 |                               |                               |                               |                              |       |       |       |      |       |       |       |      |       |      |      |    |
| K                             | -0.14 | 0.09           | -0.25 | 0.17  | 0.41  | -0.11 | 0.71  | 1     |                 |                               |                               |                               |                              |       |       |       |      |       |       |       |      |       |      |      |    |
| Cl <sup>-</sup>               | -0.38 | -0.07          | -0.02 | 0.51  | 0.43  | 0.11  | 0.64  | 0.23  | 1               |                               |                               |                               |                              |       |       |       |      |       |       |       |      |       |      |      |    |
| HCO <sub>3</sub> <sup>-</sup> | 0.80  | -0.21          | -0.08 | -0.76 | -0.23 | 0.22  | -0.49 | -0.14 | -0.59           | 1                             |                               |                               |                              |       |       |       |      |       |       |       |      |       |      |      |    |
| CO <sub>3</sub> <sup>2-</sup> | 0.54  | -0.27          | -0.16 | -0.46 | 0.05  | -0.17 | 0.15  | 0.44  | -0.28           | 0.45                          | 1                             |                               |                              |       |       |       |      |       |       |       |      |       |      |      |    |
| SO <sub>4</sub> <sup>2-</sup> | -0.45 | 0.05           | -0.25 | 0.67  | 0.87  | 0.39  | 0.82  | 0.54  | 0.56            | -0.41                         | 0.17                          | 1                             |                              |       |       |       |      |       |       |       |      |       |      |      |    |
| NO <sub>3</sub> <sup>-</sup>  | -0.62 | 0.10           | -0.06 | 0.58  | 0.19  | -0.27 | 0.27  | 0.02  | 0.27            | -0.63                         | -0.26                         | 0.16                          | 1                            |       |       |       |      |       |       |       |      |       |      |      |    |
| Si                            | -0.29 | 0.54           | -0.08 | 0.30  | 0.38  | 0.02  | 0.36  | 0.30  | -0.24           | 0.00                          | 0.13                          | 0.28                          | 0.07                         | 1     |       |       |      |       |       |       |      |       |      |      |    |
| As                            | -0.11 | -0.11          | -0.02 | 0.20  | 0.49  | 0.26  | 0.65  | 0.29  | 0.45            | -0.04                         | 0.21                          | 0.56                          | -0.16                        | 0.21  | 1     |       |      |       |       |       |      |       |      |      |    |
| Al                            | -0.82 | 0.35           | -0.10 | 0.91  | 0.62  | 0.20  | 0.34  | -0.06 | 0.38            | -0.66                         | -0.50                         | 0.50                          | 0.53                         | 0.33  | 0.08  | 1     |      |       |       |       |      |       |      |      |    |
| Cu                            | -0.81 | 0.37           | -0.15 | 0.91  | 0.66  | 0.21  | 0.38  | 0.03  | 0.38            | -0.65                         | -0.45                         | 0.54                          | 0.54                         | 0.35  | 0.07  | 0.99  | 1    |       |       |       |      |       |      |      |    |
| Fe                            | -0.85 | 0.37           | -0.19 | 0.90  | 0.55  | 0.05  | 0.35  | -0.04 | 0.35            | -0.74                         | -0.47                         | 0.46                          | 0.59                         | 0.35  | -0.01 | 0.96  | 0.95 | 1     |       |       |      |       |      |      |    |
| Pb                            | -0.34 | -0.58          | -0.19 | 0.39  | 0.31  | -0.07 | 0.30  | 0.05  | 0.49            | -0.31                         | -0.14                         | 0.35                          | 0.38                         | -0.17 | 0.08  | 0.40  | 0.38 | 0.37  | 1     |       |      |       |      |      |    |
| Sr <sup>2+</sup>              | -0.17 | -0.17          | -0.29 | 0.29  | 0.54  | 0.26  | 0.72  | 0.67  | 0.24            | -0.12                         | 0.39                          | 0.73                          | -0.04                        | 0.25  | 0.50  | -0.03 | 0.00 | -0.01 | 0.17  | 1     |      |       |      |      |    |
| Zn                            | -0.78 | 0.35           | -0.20 | 0.91  | 0.68  | 0.25  | 0.39  | 0.02  | 0.38            | -0.61                         | -0.44                         | 0.55                          | 0.53                         | 0.36  | 0.10  | 0.99  | 0.99 | 0.94  | 0.39  | 0.02  | 1    |       |      |      |    |
| Hg                            | -0.25 | 0.47           | 0.09  | 0.23  | 0.08  | 0.14  | 0.16  | -0.04 | 0.00            | -0.19                         | -0.29                         | 0.04                          | 0.11                         | 0.29  | 0.08  | 0.08  | 0.07 | 0.15  | -0.43 | 0.16  | 0.07 | 1     |      |      |    |
| Tl                            | -0.72 | 0.23           | -0.22 | 0.84  | 0.64  | 0.21  | 0.28  | -0.07 | 0.32            | -0.56                         | -0.38                         | 0.52                          | 0.54                         | 0.29  | -0.01 | 0.96  | 0.96 | 0.92  | 0.47  | -0.04 | 0.96 | -0.02 | 1    |      |    |
| Sb                            | -0.38 | -0.41          | -0.24 | 0.38  | 0.18  | -0.20 | 0.42  | 0.18  | 0.58            | -0.61                         | -0.10                         | 0.39                          | 0.34                         | -0.37 | 0.06  | 0.25  | 0.24 | 0.36  | 0.68  | 0.27  | 0.22 | -0.27 | 0.29 | 1    |    |
| Se                            | -0.23 | -0.24          | -0.27 | 0.30  | 0.03  | 0.12  | 0.02  | -0.26 | 0.41            | -0.42                         | -0.28                         | 0.05                          | 0.57                         | -0.38 | -0.22 | 0.25  | 0.24 | 0.32  | 0.39  | -0.10 | 0.24 | -0.13 | 0.29 | 0.53 | 1  |

Red and blue numbers have significant positive and negative correlations, respectively ( $p < 0.05$ ).

**Table S2.** Eigenvectors from principal component analysis for the different types of water samples collected in the study area (with transformed variables to square root values).

| Variable <sup>1/2</sup> (var <sub>j</sub> ) | Eigenvectors (Ev <sub>ij</sub> ) |        |        |        |        |
|---------------------------------------------|----------------------------------|--------|--------|--------|--------|
|                                             | PC1                              | PC2    | PC3    | PC4    | PC5    |
| pH                                          | −0.278                           | 0.092  | 0.047  | 0.182  | 0.021  |
| E <sub>H</sub>                              | 0.081                            | −0.101 | −0.432 | −0.179 | −0.016 |
| DO                                          | −0.07                            | −0.132 | −0.08  | −0.293 | −0.266 |
| EC                                          | 0.312                            | −0.021 | −0.051 | −0.006 | −0.062 |
| Ca                                          | 0.237                            | 0.237  | −0.101 | 0.252  | −0.012 |
| Mg                                          | 0.062                            | 0.107  | −0.128 | 0.522  | −0.4   |
| Na                                          | 0.201                            | 0.333  | 0.019  | −0.226 | −0.043 |
| K                                           | 0.066                            | 0.365  | −0.023 | −0.252 | 0.231  |
| Cl <sup>−</sup>                             | 0.187                            | 0.106  | 0.231  | −0.116 | −0.37  |
| HCO <sub>3</sub> <sup>−</sup>               | −0.244                           | 0.104  | −0.109 | 0.36   | 0.092  |
| CO <sub>3</sub> <sup>2−</sup>               | −0.124                           | 0.323  | 0.028  | 0.013  | 0.376  |
| SO <sub>4</sub> <sup>2−</sup>               | 0.228                            | 0.313  | 0.002  | 0.074  | −0.05  |
| NO <sub>3</sub> <sup>−</sup>                | 0.192                            | −0.163 | 0.115  | −0.23  | 0.18   |
| Si                                          | 0.096                            | 0.11   | −0.389 | −0.055 | 0.307  |
| As                                          | 0.076                            | 0.332  | −0.035 | 0.01   | −0.287 |
| Al                                          | 0.295                            | −0.136 | −0.083 | 0.11   | 0.05   |
| Cu                                          | 0.297                            | −0.11  | −0.092 | 0.107  | 0.086  |
| Fe                                          | 0.293                            | −0.148 | −0.061 | 0.012  | 0.115  |
| Pb                                          | 0.156                            | 0.018  | 0.375  | 0.132  | 0.142  |
| Sr                                          | 0.088                            | 0.415  | 0.022  | −0.07  | −0.037 |
| Zn                                          | 0.296                            | −0.098 | −0.091 | 0.144  | 0.08   |
| Hg                                          | 0.042                            | −0.016 | −0.3   | −0.251 | −0.353 |
| Tl                                          | 0.282                            | −0.126 | −0.035 | 0.201  | 0.157  |
| Sb                                          | 0.149                            | 0.044  | 0.421  | −0.132 | 0.012  |
| Se                                          | 0.108                            | −0.161 | 0.326  | 0.075  | −0.108 |
| Eigenvalue (Eg)                             | 9.773                            | 4.06   | 3.305  | 1.866  | 1.539  |
| Variance (%)                                | 39.1                             | 16.3   | 13.2   | 7.5    | 6.2    |
| Cumulative (%)                              | 39.1                             | 55.4   | 68.6   | 76.1   | 82.2   |

**Table S3.** Water quality classification considering the PCA values calculated with physicochemical parameters and chemical compositions of aqueous solution samples.

| Samples <sub>sk</sub> | PCA <sub>sk</sub> value | Water quality grades             |
|-----------------------|-------------------------|----------------------------------|
| L3                    | 11.70                   | Extremely contaminated           |
| L4                    | 6.28                    |                                  |
| L5                    | 5.21                    |                                  |
| OA1                   | 4.24                    | Strongly contaminated            |
| L2                    | 3.98                    |                                  |
| L7                    | 3.71                    |                                  |
| R3                    | 3.49                    |                                  |
| R5                    | 3.48                    |                                  |
| R4                    | 3.17                    | Moderately/strongly contaminated |
| L6                    | 2.96                    |                                  |
| OA2                   | 2.70                    |                                  |
| R6                    | 2.63                    |                                  |
| R2                    | 2.62                    |                                  |
| L1                    | 2.49                    |                                  |
| R1                    | 2.28                    | Slightly/moderately contaminated |
| CA                    | 2.08                    |                                  |
| GA                    | 1.79                    |                                  |
| W1                    | 1.61                    | Uncontaminated                   |
| W2                    | 1.51                    |                                  |
| EG                    | 1.40                    |                                  |
| ES                    | 1.38                    |                                  |

**Table S4.** Proposed reactions involved in the oxidation of primary sulfide minerals and precipitation or dissolution reactions that produce the SMPs that were identified by XRD in the waste and sediment samples collected from AMDW4 [7,14,52].

| Symbol                                                                                        | Chemical reaction of mineral sulfide oxidation in the AMWD weathering |                                                                                                                                                                                              | No.  | Reference  |
|-----------------------------------------------------------------------------------------------|-----------------------------------------------------------------------|----------------------------------------------------------------------------------------------------------------------------------------------------------------------------------------------|------|------------|
| L                                                                                             | Lautite                                                               | $\text{CuAsS}$                                                                                                                                                                               |      |            |
|                                                                                               |                                                                       | $\text{CuAsS} + 5.25\text{O}_2 + 1.5\text{H}_2\text{O} = \text{H}_2\text{AsO}_4^- + 2\text{SO}_4^{2-} + \text{Cu}^+ + \text{H}^+$                                                            | 1    | This study |
| Ccp                                                                                           | Chalcopyrite                                                          | $\text{CuFeS}_2$                                                                                                                                                                             |      |            |
|                                                                                               |                                                                       | $\text{CuFeS}_2 + \text{O}_2 + 4\text{H}^+ = \text{Cu}^{2+} + \text{Fe}^{2+} + 2\text{S} + 2\text{H}_2\text{O}$                                                                              | 2    | [7]        |
|                                                                                               |                                                                       | $\text{CuFeS}_2 + 4\text{Fe}^{3+} = \text{Cu}^{2+} + 5\text{Fe}^{2+} + 2\text{S}$                                                                                                            | 3    | [7]        |
| Cct                                                                                           | Chalcocite                                                            | $\text{Cu}_2\text{S}$                                                                                                                                                                        |      |            |
|                                                                                               |                                                                       | $\text{Cu}_2\text{S} + 2\text{O}_2 = 2\text{Cu}^+ + \text{SO}_4^{2-}$                                                                                                                        | 4    | This study |
| Sp                                                                                            | Sphalerite                                                            | $\text{ZnS}$                                                                                                                                                                                 |      |            |
|                                                                                               |                                                                       | $\text{ZnS} + 2\text{O}_2 = \text{Zn}^{2+} + \text{SO}_4^{2-}$                                                                                                                               | 5    | [14]       |
| Gtn                                                                                           | Gratonite                                                             | $\text{PbS}_2\text{As}_2\text{S}_3$                                                                                                                                                          |      |            |
|                                                                                               |                                                                       | $\text{PbS}_2\text{As}_2\text{S}_3 + 13\text{O}_2 + 2\text{H}_2\text{O} = \text{Pb}^{2+} + 2\text{H}_2\text{AsO}_4^{2-} + 5\text{SO}_4^{2-}$                                                 | 6    | This study |
| Py                                                                                            | Pyrite                                                                | $\text{FeS}_2$                                                                                                                                                                               |      |            |
|                                                                                               |                                                                       | $\text{FeS}_2 + 3.5\text{O}_2 + \text{H}_2\text{O} = \text{Fe}^{2+} + 2\text{SO}_4^{2-} + 2\text{H}^+$                                                                                       | 7    | [14]       |
|                                                                                               |                                                                       | $\text{FeS}_2 + 1.5\text{O}_2 + \text{H}_2\text{O} = \text{Fe}^{2+} + \text{S} + \text{SO}_4^{2-} + 2\text{H}^+$                                                                             | 8    | This study |
| Apy                                                                                           | Arsenopyrite                                                          | $\text{AsFeS}$                                                                                                                                                                               |      |            |
|                                                                                               |                                                                       | $\text{FeAsS} + 3.25\text{O}_2 + 1.5\text{H}_2\text{O} = \text{Fe}^{2+} + \text{SO}_4^{2-} + \text{H}_2\text{AsO}_4^- + \text{H}^+$                                                          | 9    | [14]       |
| Rlg                                                                                           | Realgar                                                               | $\text{As}_4\text{S}_4$                                                                                                                                                                      |      |            |
|                                                                                               |                                                                       | $\text{As}_4\text{S}_4 + 13.75\text{O}_2 + 4.5\text{H}_2\text{O} = \text{H}^+ + 4\text{H}_2\text{AsO}_4^{2-} + 4\text{SO}_4^{2-}$                                                            | 10   | [52]       |
| Orp                                                                                           | Orpiment                                                              | $\text{As}_2\text{S}_3$                                                                                                                                                                      |      |            |
|                                                                                               |                                                                       | $\text{As}_2\text{S}_3 + 8.75\text{O}_2 + 2.5\text{H}_2\text{O} = \text{H}^+ + 2\text{H}_2\text{AsO}_4^{2-} + 3\text{SO}_4^{2-}$                                                             | 11   | [52]       |
| <b>Chemical reaction of precipitation (p) and dissolution (d) of secondary mineral phases</b> |                                                                       |                                                                                                                                                                                              |      |            |
| Gth                                                                                           | Goethite                                                              | $\text{FeO(OH)}$                                                                                                                                                                             |      |            |
|                                                                                               |                                                                       | $\text{Fe}^{3+} + 2\text{H}_2\text{O} = \text{FeO(OH)} + 3\text{H}^+$                                                                                                                        | p 12 | [14]       |
|                                                                                               |                                                                       | $\text{FeO(OH)} + 3\text{H}^+ = \text{Fe}^{3+} + 2\text{H}_2\text{O}$                                                                                                                        | d 13 | [7]        |
| He                                                                                            | Hematite                                                              | $\text{Fe}_{1.8}\text{H}_{0.66}\text{O}_3$                                                                                                                                                   |      |            |
|                                                                                               |                                                                       | $\text{Fe}^{2+} + 0.25\text{O}_2 + \text{H}^+ = \text{Fe}^{3+} + 0.5\text{H}_2\text{O}$                                                                                                      | 14   | [7]        |
|                                                                                               |                                                                       | $1.8\text{Fe}^{3+} + 3\text{H}_2\text{O} = \text{Fe}_{1.8}\text{H}_{0.66}\text{O}_3 + 5.34\text{H}^+$                                                                                        | p 15 | [14]       |
|                                                                                               |                                                                       | $\text{Fe}_{1.8}\text{H}_{0.66}\text{O}_3 + 5.34\text{H}^+ = 1.8\text{Fe}^{3+} + 3\text{H}_2\text{O}$                                                                                        | d 16 | This study |
| Lpd                                                                                           | Lepidocrocite                                                         | $\text{Fe}^{+3}\text{O(OH)}$                                                                                                                                                                 |      |            |
|                                                                                               |                                                                       | $\text{Fe}^{3+} + 2\text{H}_2\text{O} = \text{Fe}^{+3}\text{O(OH)} + 3\text{H}^+$                                                                                                            | p 17 | [52]       |
|                                                                                               |                                                                       | $\text{Fe}^{+3}\text{O(OH)} + 3\text{H}^+ = \text{Fe}^{3+} + 2\text{H}_2\text{O}$                                                                                                            | d 18 | [52]       |
| Fhy                                                                                           | Ferrihydrite                                                          | $\text{Fe(OH)}_3$                                                                                                                                                                            |      |            |
|                                                                                               |                                                                       | $\text{Fe}^{3+} + 3\text{H}_2\text{O} = \text{Fe(OH)}_3 + 3\text{H}^+$                                                                                                                       | p 19 | This study |
|                                                                                               |                                                                       | $\text{Fe(OH)}_3 + 3\text{H}^+ = \text{Fe}^{3+} + 3\text{H}_2\text{O}$                                                                                                                       | d 20 | [7]        |
| Cal                                                                                           | Calcite                                                               | $\text{CaCO}_3$                                                                                                                                                                              |      |            |
|                                                                                               |                                                                       | $\text{Ca}^{2+} + \text{HCO}_3^- = \text{CaCO}_3 + \text{H}^+$                                                                                                                               | p 21 | This study |
|                                                                                               |                                                                       | $\text{CaCO}_3 + \text{H}^+ = \text{Ca}^{2+} + \text{HCO}_3^-$                                                                                                                               | d 22 | [7]        |
|                                                                                               |                                                                       | $\text{Ca}^{2+} + \text{CO}_2 + \text{H}_2\text{O} = \text{CaCO}_3 + 2\text{H}^+$                                                                                                            | p 23 | This study |
|                                                                                               |                                                                       | $\text{CaCO}_3 + 2\text{H}^+ = \text{Ca}^{2+} + \text{CO}_2 + \text{H}_2\text{O}$                                                                                                            | d 24 | [7]        |
| Gy                                                                                            | Gypsum                                                                | $\text{CaSO}_4 \cdot 2\text{H}_2\text{O}$                                                                                                                                                    |      |            |
|                                                                                               |                                                                       | $\text{Ca}^{2+} + \text{SO}_4^{2-} + 2\text{H}_2\text{O} = \text{CaSO}_4 \cdot 2\text{H}_2\text{O}$                                                                                          | p 25 | This study |
|                                                                                               |                                                                       | $\text{CaSO}_4 \cdot 2\text{H}_2\text{O} = \text{Ca}^{2+} + \text{SO}_4^{2-} + 2\text{H}_2\text{O}$                                                                                          | d 26 | [7]        |
| Scr                                                                                           | Scorodite                                                             | $\text{FeAsO}_4 (\text{H}_2\text{O})_2$                                                                                                                                                      |      |            |
|                                                                                               |                                                                       | $\text{Fe}^{3+} + 2\text{H}_2\text{AsO}_4^{2-} + 2\text{H}_2\text{O} = \text{FeAsO}_4 (\text{H}_2\text{O})_2 + 4\text{H}^+$                                                                  | p 27 | This study |
|                                                                                               |                                                                       | $\text{FeAsO}_4 (\text{H}_2\text{O})_2 + 4\text{H}^+ = \text{Fe}^{3+} + 2\text{H}_2\text{AsO}_4^{2-} + 2\text{H}_2\text{O}$                                                                  | d 28 | [52]       |
| Bdt                                                                                           | Beudantite                                                            | $\text{Pb (Fe}_{2.5}\text{Al}_{0.5}) (\text{AsO}_4)\text{SO}_4 (\text{OH})_6$                                                                                                                |      |            |
|                                                                                               |                                                                       | $\text{Pb}^{2+} + 2.5\text{Fe}^{3+} + 0.5\text{Al}^{3+} + \text{AsO}_4^{3-} + \text{SO}_4^{2-} + 6\text{OH}^- = \text{Pb (Fe}_{2.5}\text{Al}_{0.5}) (\text{AsO}_4)\text{SO}_4 (\text{OH})_6$ | p 29 | This study |
|                                                                                               |                                                                       | $\text{Pb (Fe}_{2.5}\text{Al}_{0.5}) (\text{AsO}_4)\text{SO}_4 (\text{OH})_6 = \text{Pb}^{2+} + 2.5\text{Fe}^{3+} + 0.5\text{Al}^{3+} + \text{AsO}_4^{3-} + \text{SO}_4^{2-} + 6\text{OH}^-$ | d 30 | [52]       |
| Pb-Jrs                                                                                        | Plumbojarosite                                                        | $\text{(Pb}_{0.43}\text{K}_{0.14})\text{Fe}_3 (\text{SO}_4)_2 (\text{OH})_6$                                                                                                                 |      |            |
|                                                                                               |                                                                       | $0.43\text{Pb}^{2+} + 0.14\text{K}^+ + 3\text{Fe}^{3+} + 2\text{SO}_4^{2-} + 6\text{H}_2\text{O} = \text{(Pb}_{0.43}\text{K}_{0.14})\text{Fe}_3 (\text{SO}_4)_2 (\text{OH})_6 + 6\text{H}^+$ | p 31 | This study |
|                                                                                               |                                                                       | $\text{(Pb}_{0.43}\text{K}_{0.14})\text{Fe}_3 (\text{SO}_4)_2 (\text{OH})_6 + 6\text{H}^+ = 0.43\text{Pb}^{2+} + 0.14\text{K}^+ + 3\text{Fe}^{3+} + 2\text{SO}_4^{2-} + 6\text{H}_2\text{O}$ | d 32 | This study |
| K-Jrs                                                                                         | K-Jarosite                                                            | $\text{K}_{0.86} (\text{H}_3\text{O})_{0.14} \text{Fe}_3 (\text{SO}_4)_2 (\text{OH})_6$                                                                                                      |      |            |

|      |                |                                                                                                                                                                                   |   |    |            |
|------|----------------|-----------------------------------------------------------------------------------------------------------------------------------------------------------------------------------|---|----|------------|
|      |                | $3\text{Fe}^{3+} + \text{K}^+ + 0.14\text{H}_2\text{O} + 2\text{SO}_4^{2-} + 6\text{H}_2\text{O} = \text{KFe}_3(\text{SO}_4)_2(\text{OH})_6 + 6\text{H}^+$                        | p | 33 | [14]       |
|      |                | $\text{KFe}_3(\text{SO}_4)_2(\text{OH})_6 + 6\text{H}^+ = 3\text{Fe}^{3+} + \text{K}^+ + 0.14\text{H}_2\text{O} + 2\text{SO}_4^{2-} + 6\text{H}_2\text{O}$                        | d | 34 | [52]       |
| Mel  | Melanterite    | $\text{FeSO}_4 \cdot 7\text{H}_2\text{O}$                                                                                                                                         |   |    |            |
|      |                | $\text{Fe}^{2+} + \text{SO}_4^{2-} + 7\text{H}_2\text{O} = \text{FeSO}_4 \cdot 7\text{H}_2\text{O}$                                                                               | p | 35 | This study |
|      |                | $\text{FeSO}_4 \cdot 7\text{H}_2\text{O} = \text{Fe}^{2+} + \text{SO}_4^{2-} + 7\text{H}_2\text{O}$                                                                               | d | 36 | [52]       |
| Adm  | Adamite        | $\text{Zn}_2(\text{AsO}_4)(\text{OH})$                                                                                                                                            |   |    |            |
|      |                | $2\text{Zn}^{2+} + \text{H}_2\text{AsO}_4^- + \text{H}_2\text{O} = \text{Zn}_2(\text{AsO}_4)(\text{OH}) + 3\text{H}^+$                                                            | p | 37 | This study |
|      |                | $\text{Zn}_2(\text{AsO}_4)(\text{OH}) + 3\text{H}^+ = 2\text{Zn}^{2+} + \text{H}_2\text{AsO}_4^- + \text{H}_2\text{O}$                                                            | d | 38 | [52]       |
| Lnk  | Lanarkite      | $\text{Pb}_2(\text{SO}_4)\text{O}$                                                                                                                                                |   |    |            |
|      |                | $2\text{Pb}^{2+} + \text{SO}_4^{2-} + 0.5\text{O}_2 = \text{Pb}_2(\text{SO}_4)\text{O}$                                                                                           | p | 39 | This study |
|      |                | $\text{Pb}_2(\text{SO}_4)\text{O} = 2\text{Pb}^{2+} + \text{SO}_4^{2-} + 0.5\text{O}_2$                                                                                           | d | 40 | [52]       |
| Bch  | Brochantite    | $\text{Cu}_4(\text{SO}_4)(\text{OH})_6$                                                                                                                                           |   |    |            |
|      |                | $4\text{Cu}^{2+} + \text{SO}_4^{2-} + 6\text{H}_2\text{O} = \text{Cu}_4(\text{SO}_4)(\text{OH})_6 + 6\text{H}^+$                                                                  | p | 41 | This study |
|      |                | $\text{Cu}_4(\text{SO}_4)(\text{OH})_6 + 6\text{H}^+ = 4\text{Cu}^{2+} + \text{SO}_4^{2-} + 6\text{H}_2\text{O}$                                                                  | d | 42 | [52]       |
| Cld  | Claudetite     | $\text{As}_2\text{O}_3$                                                                                                                                                           |   |    |            |
|      |                | $\text{As}_4\text{S}_4 + 11\text{O}_2 = 2\text{As}_2\text{O}_3 + 4\text{SO}_4^{2-}$                                                                                               | p | 43 | This study |
|      |                | $2\text{As}_2\text{O}_3 + 4\text{SO}_4^{2-} = \text{As}_4\text{S}_4 + 11\text{O}_2$                                                                                               | d | 44 | [52]       |
| Sgn  | Segnetite      | $\text{PbFe}_3(\text{AsO}_4)(\text{AsO}_3\text{OH})(\text{OH})_6$                                                                                                                 |   |    |            |
|      |                | $\text{Pb}^{2+} + 3\text{Fe}^{3+} + \text{AsO}_4^{3-} + \text{HAsO}_4^{2-} + 6\text{H}_2\text{O} = \text{PbFe}_3(\text{AsO}_4)(\text{AsO}_3\text{OH})(\text{OH})_6 + 6\text{H}^+$ | p | 45 | This study |
|      |                | $\text{PbFe}_3(\text{AsO}_4)(\text{AsO}_3\text{OH})(\text{OH})_6 + 6\text{H}^+ = \text{Pb}^{2+} + 3\text{Fe}^{3+} + \text{AsO}_4^{3-} + \text{HAsO}_4^{2-} + 6\text{H}_2\text{O}$ | d | 46 | This study |
| Cqm  | Coquimbite     | $\text{Fe}_{1.54}\text{Al}_{0.46}(\text{SO}_4)_3 \cdot 9\text{H}_2\text{O}$                                                                                                       |   |    |            |
|      |                | $1.54\text{Fe}^{3+} + 0.46\text{Al}^{3+} + 3\text{SO}_4^{2-} + 9\text{H}_2\text{O} = \text{Fe}_{1.54}\text{Al}_{0.46}(\text{SO}_4)_3 \cdot 9\text{H}_2\text{O}$                   | p | 47 | This study |
|      |                | $\text{Fe}_{1.54}\text{Al}_{0.46}(\text{SO}_4)_3 \cdot 9\text{H}_2\text{O} = 1.54\text{Fe}^{3+} + 0.46\text{Al}^{3+} + 3\text{SO}_4^{2-} + 9\text{H}_2\text{O}$                   | d | 48 | [52]       |
| Grn  | Guerinite      | $\text{Ca}_5(\text{AsO}_4)_2(\text{AsO}_3(\text{OH})) \cdot 4\text{H}_2\text{O}$                                                                                                  |   |    |            |
|      |                | $5\text{Ca}^{2+} + 2\text{AsO}_4^{3-} + \text{HAsO}_4 + 4\text{H}_2\text{O} = \text{Ca}_5(\text{AsO}_4)_2(\text{AsO}_3(\text{OH})) \cdot 4\text{H}_2\text{O}$                     | p | 49 | This study |
|      |                | $\text{Ca}_5(\text{AsO}_4)_2(\text{AsO}_3(\text{OH})) \cdot 4\text{H}_2\text{O} = 5\text{Ca}^{2+} + 2\text{AsO}_4^{3-} + \text{HAsO}_4 + 4\text{H}_2\text{O}$                     | d | 50 | [52]       |
| Skn  | Sarkinite      | $\text{Mn}_2\text{AsO}_4(\text{OH})$                                                                                                                                              |   |    |            |
|      |                | $2\text{Mn}^{2+} + \text{AsO}_4^{3-} + \text{H}_2\text{O} = \text{Mn}_2\text{AsO}_4(\text{OH}) + \text{H}^+$                                                                      | p | 51 | This study |
|      |                | $\text{Mn}_2\text{AsO}_4(\text{OH}) + \text{H}^+ = 2\text{Mn}^{2+} + \text{AsO}_4^{3-} + \text{H}_2\text{O}$                                                                      | d | 52 | This study |
| Fcpp | Ferricopiapite | $\text{Fe}_{4.67}(\text{SO}_4)_6(\text{OH})_2 \cdot 20\text{H}_2\text{O}$                                                                                                         |   |    |            |
|      |                | $4.67\text{Fe}^{3+} + 6\text{SO}_4^{2-} + 22\text{H}_2\text{O} = \text{Fe}_{4.67}(\text{SO}_4)_6(\text{OH})_2 \cdot 20\text{H}_2\text{O} + 2\text{H}^+$                           | p | 53 | This study |
|      |                | $\text{Fe}_{4.67}(\text{SO}_4)_6(\text{OH})_2 \cdot 20\text{H}_2\text{O} + 2\text{H}^+ = 4.67\text{Fe}^{3+} + 6\text{SO}_4^{2-} + 22\text{H}_2\text{O}$                           | d | 54 | [52]       |

**Table S5.** SEM-EDS analysis of waste and stream sediment samples: AMWD (a, b), XS1 (c, d), XS2 (e), XS3 (f, g) and XS4 (h). SMPs were assigned by mass balance reconstruction based on chemical composition.

|    | Spot | Element | Wt (%) | At (%) | Mineral phases associated |
|----|------|---------|--------|--------|---------------------------|
| a  | P1   | O       | 55.0   | 78.3   |                           |
|    |      | S       | 12.8   | 9.1    |                           |
|    |      | Fe      | 13.7   | 5.6    | Fcpp                      |
|    |      | Si      | 2.5    | 2.0    | Bdt                       |
|    |      | Al      | 2.1    | 1.8    | K-Jrs                     |
|    |      | Zn      | 3.5    | 1.2    | Als                       |
|    |      | Pb      | 7.4    | 0.8    | Lnk                       |
|    |      | As      | 2.2    | 0.7    |                           |
|    |      | K       | 0.8    | 0.5    |                           |
|    | P2   | O       | 48.7   | 79.6   | Lnk                       |
|    |      | S       | 8.6    | 7.0    | IOH                       |
|    |      | Fe      | 10.7   | 5.0    | Fcpp                      |
|    |      | Si      | 4.0    | 3.7    | Bdt                       |
|    |      | Pb      | 24.6   | 3.1    | Qz                        |
|    |      | As      | 1.8    | 0.6    | Adm                       |
|    |      | Al      | 0.5    | 0.5    | Als                       |
| Zn |      | 1.1     | 0.5    |        |                           |
| b  | P3   | O       | 27.5   | 52.6   |                           |
|    |      | Fe      | 24.9   | 13.6   |                           |
|    |      | S       | 11.2   | 10.6   | Scr                       |
|    |      | As      | 24.2   | 9.9    | Apy                       |
|    |      | Si      | 6.6    | 7.2    |                           |
|    |      | Al      | 4.8    | 5.4    |                           |
|    |      | K       | 0.9    | 0.7    |                           |
|    | P4   | O       | 44.8   | 67.3   |                           |
|    |      | S       | 22.6   | 16.9   |                           |
|    |      | Fe      | 23.6   | 10.1   | Fcpp                      |
|    |      | Al      | 3.8    | 3.4    | Scr                       |
|    |      | As      | 4      | 1.3    |                           |
|    |      | Si      | 1.2    | 1.1    |                           |
|    | c    | P5      | O      | 25.1   | 51.7                      |
| Fe |      |         | 59.5   | 35.2   |                           |
| As |      |         | 3.1    | 1.4    | As-bearing IOH            |
| Zn |      |         | 3.6    | 1.8    | Fcpp                      |
| Si |      |         | 4.7    | 5.5    | Adm                       |
| S  |      |         | 2.4    | 2.5    | Scr                       |
| Al |      |         | 1.6    | 1.9    |                           |
| P6 |      | O       | 31     | 44.1   |                           |
| Si | 69   | 55.9    | Qz     |        |                           |
| d  | P7   | O       | 27.2   | 55.7   |                           |
|    |      | Fe      | 30.6   | 17.9   | Scr                       |
|    |      | As      | 25.9   | 11.3   | K-Jrs                     |
|    |      | S       | 7.8    | 7.9    | Adm                       |
|    |      | Si      | 3.7    | 4.4    | Apy                       |
|    |      | Zn      | 3.8    | 1.9    |                           |
|    |      | K       | 1.1    | 1.0    |                           |
|    | e    | P8      | O      | 52.1   | 75.5                      |
| Si |      |         | 10.6   | 8.7    | Bdt                       |
| Fe |      |         | 16.2   | 6.7    | Fcpp                      |
| Al |      |         | 3.9    | 3.3    | IOH                       |
| S  |      |         | 4.1    | 3.0    | Cal                       |
| Pb |      |         | 8.7    | 1.0    | Qz                        |
| As |      |         | 2.8    | 0.9    | Als                       |
| Ca |      |         | 0.8    | 0.5    |                           |
| K  |      |         | 0.7    | 0.4    |                           |
| P9 |      | O       | 36.5   | 64.1   |                           |
|    |      | Fe      | 52.9   | 26.6   | IOH                       |



|   |     |    |      |      |        |
|---|-----|----|------|------|--------|
|   |     | Si | 5.3  | 5.3  | Scr    |
|   |     | Al | 1.9  | 1.9  | Cal    |
|   |     | Ca | 0.9  | 0.6  | Qz     |
|   |     | S  | 0.7  | 0.6  | Als    |
|   |     | As | 1.5  | 0.6  | Fcpp   |
|   |     | K  | 0.4  | 0.3  |        |
|   |     | O  | 33.8 | 59.4 |        |
| f | P10 | Fe | 37.2 | 18.7 | IOH    |
|   |     | Si | 8.5  | 8.5  | Scr    |
|   |     | Al | 6.1  | 6.4  | Adm    |
|   |     | As | 7.7  | 2.9  | Cal    |
|   |     | Ca | 3.4  | 2.4  | Qz     |
|   |     | Zn | 2.7  | 1.2  | Als    |
|   |     | K  | 0.8  | 0.5  |        |
| g | P11 | O  | 52.7 | 77.2 |        |
|   |     | Al | 2.5  | 2.2  | Fcpp   |
|   |     | Si | 4.4  | 3.7  | Bdt    |
|   |     | S  | 7.3  | 5.4  | IOH    |
|   |     | K  | 2.0  | 1.2  | Pb-Jrs |
|   |     | Ca | 0.6  | 0.4  | Cal    |
|   |     | Fe | 20.2 | 8.5  | Qz     |
|   |     | As | 2.1  | 0.7  | Als    |
|   |     | Pb | 8.2  | 0.9  |        |
| h | P12 | O  | 46.4 | 75.2 |        |
|   |     | Fe | 21.0 | 9.8  | Fcpp   |
|   |     | S  | 9.0  | 7.3  | Lnk    |
|   |     | Si | 2.7  | 2.5  | Bdt    |
|   |     | Pb | 16.4 | 2.1  | IOH    |
|   |     | Al | 2.0  | 1.9  | Cal    |
|   |     | K  | 0.7  | 0.5  | Qz     |
|   |     | Ca | 0.6  | 0.4  | Als    |
|   |     | As | 1.2  | 0.4  |        |
